April 2013

# PSYCHIATRIC SERVICES

A Journal of the  
American Psychiatric  
Association

- ◆ Recovery-Oriented ACT in Washington: Three New Studies
- ◆ Early Adoption of Drugs by Physicians: What Factors Matter?
- ◆ Disrupting Effects of “Churn” for Patients With Mental Illness
- ◆ Mental Health Courts for Adults and Children: How Effective Are They?

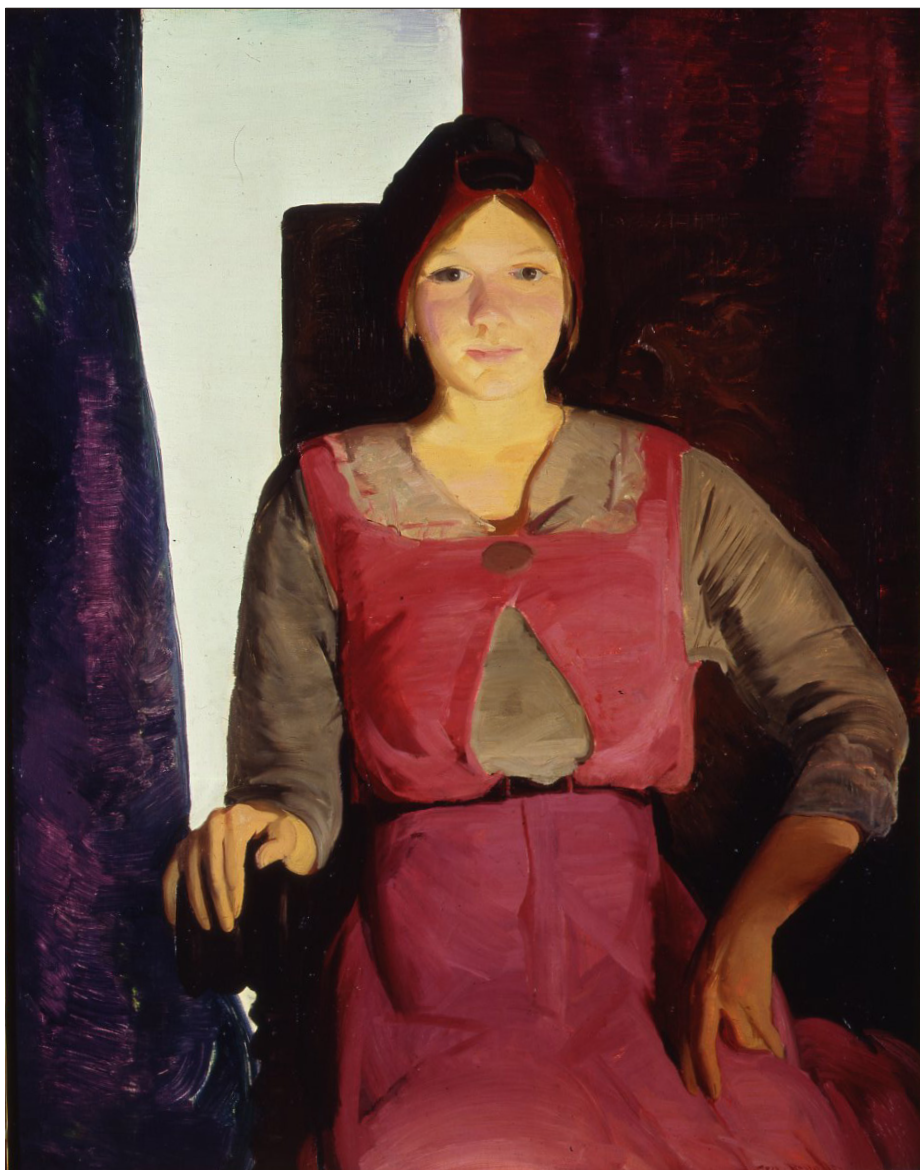

Source: http://ps.psychiatryonline.org/doi/suppl/10.1176/ps.2013.64.issue-4/suppl_file/cover.pdf
